# Coarse-grained modeling for structure, stability and flexibility of double stranded RNAs in salt solutions

Lei Jin<sup>1,†</sup>, Ya-Zhou Shi<sup>2,†</sup>, Chen-Jie Feng<sup>1</sup>, Ya-Lan Tan<sup>1</sup>, Zhi-Jie Tan<sup>1,\*</sup>

<sup>1</sup>*Center for Theoretical Physics and Key Laboratory of Artificial Micro & Nano-structures of Ministry of Education,  
School of Physics and Technology, Wuhan University, Wuhan 430072, China*

<sup>2</sup>*Research Center of Nonlinear Science, School of Mathematics and Computer Science, Wuhan Textile University,  
Wuhan 430073, China*

## Abstract

Double stranded (ds) RNAs play essential roles in many processes of cell metabolism. The knowledge of three-dimensional (3D) structure, stability and flexibility of dsRNAs in salt solutions is important for understanding their biological functions. In this work, we further developed our previously proposed coarse-grained model to predict 3D structure, stability and flexibility for dsRNAs in monovalent and divalent ion solutions through involving an implicit structure-based electrostatic potential. The model made reliable predictions for 3D structures of extensive dsRNAs ( $\leq 78$  nucleotides) with/without bulge/internal loops from their sequences, and the involvement of the structure-based electrostatic potential and corresponding ion condition can improve the predictions on 3D structures of dsRNAs in ion solutions. Furthermore, the model made good predictions on thermal stability for extensive dsRNAs over the wide range of monovalent/divalent ion concentrations, and our analyses show that thermally unfolding pathway of a dsRNA is dependent on its length as well as its sequence. In addition, the model was employed to examine the salt-dependent flexibility of a dsRNA helix and the calculated salt-dependent persistence lengths are in good accordance with experiments.

---

<sup>†</sup> The authors contributed equally to the work.

\*To whom correspondence should be addressed: [zjtan@whu.edu.cn](mailto:zjtan@whu.edu.cn)

## 1 **Introduction**

2 RNAs play a pervasive role in gene regulation and expression. In addition to single stranded (ss)  
3 RNAs such as mRNAs and tRNAs, double stranded (ds) RNAs are widespread in cells and are  
4 involved in a variety of biological functions (1-3). For examples, small noncoding dsRNAs can play  
5 a critical role in mediating neuronal differentiation (4); dsRNA segments of special lengths can  
6 inhibit the translation of mRNA molecules into proteins through attaching to mRNAs (5,6); and  
7 dsRNAs of more than 30 base-pair (bp) length can be key activators of the innate immune response  
8 against viral infections (7). Generally, dsRNAs realize their biological functions through becoming  
9 partially melted or changing their conformations (2-9). Furthermore, the inter-chain interactions in  
10 stabilizing structures of dsRNAs are very sensitive to the environment (e.g., temperature and ion  
11 conditions) (10-14). Thus, a full understanding of dsRNA-mediated biology would require the  
12 knowledge of three-dimensional (3D) structures, structural stability and flexibility of dsRNAs in ion  
13 solutions.

14 The 3D structures of RNAs including dsRNAs can be measured by several experimental  
15 methods such as X-ray crystallography, nuclear magnetic resonance (NMR) spectroscopy, and  
16 cryo-electron microscopy. However, it is still technically challenging and expensive to  
17 experimentally derive 3D structures of RNAs at high resolution and the RNA structures deposited in  
18 Protein Data Bank (PDB) are still limited (15). Therefore, as complementary methods, some  
19 computational models have been developed in recent years, aiming to predict RNA 3D structures in  
20 silico (16-23). The fragment assembly models (24-31) such as MC-Fold/MC-Sym pipeline (24),  
21 3dRNA (25-27), RNAComposer (28) and Vfold3D (29,30) can successfully predict 3D structures of  
22 RNAs including even large RNAs at fast speed, however, these methods are generally based on  
23 given secondary structures and the limited known RNA 3D structures deposited in PDB. Although  
24 the fragment assembly method of FARNA (31) can predict 3D structures for RNAs from sequences,  
25 it could be only efficient for small RNAs due to its full-atomic resolution. In parallel ways, some  
26 coarse-grained (CG) models (32-40) such as iFold (41), SimRNA (42), HiRE-RNA (43) and RACER  
27 (44,45) have been proposed to predict 3D structures for RNAs with medium-lengths from their  
28 sequences based on knowledge-based statistical potentials or/and experiential parameters. However,  
29 these existing 3D structure prediction models seldom make quantitative predictions for

1 thermodynamic stability and flexibility of RNAs.

2 Simultaneously, some models have been employed to predict thermodynamics of RNAs.  
3 Vfold2D/VfoldThermal (29,30) with involving thermodynamic parameters can make reliable  
4 predictions on the free energy landscape of RNAs including pseudoknots at secondary structure level.  
5 The model proposed by Denesyuk and Thirumalai (46,47) can well predict the thermodynamics of  
6 small RNAs, while such structure-based (Gö-like) model could not predict 3D structures of RNAs  
7 solely from the sequences. Although other models such as iFold (41), HiRE-RNA (43), oxRNA (48)  
8 and NARES-2P (49,50) may give melting curves of RNAs, there is still lack of extensive  
9 experimental validation for these models.

10 Furthermore, RNAs are highly charged polyanionic molecules, and RNA structure and stability  
11 are generally sensitive to solution ion conditions, especially multivalent ions such as  $Mg^{2+}$  (8,10-14).  
12 The role of ions in RNA structure and stability, especially the role of  $Mg^{2+}$  which is generally beyond  
13 the mean-field descriptions (51,52), is seldom involved in the existing 3D structure prediction  
14 models. To predict the 3D structures and stability of RNAs in ion solutions, we have developed a CG  
15 model with implicit electrostatic potential (53,54), and the model has been validated through making  
16 reliable predictions on 3D structures and stability of RNA hairpins and pseudoknots as well as the  
17 ion effect on their stability. However, the model at present version is only applicable for ssRNAs and  
18 the implicit electrostatic potential of ions is independent on RNA structures. Thus, the model cannot  
19 make reliable predictions on 3D structure and stability for dsRNAs and may not detailedly predict  
20 the ion effect on 3D structures of RNAs.

21 In this work, we further developed our previous three-bead CG model for ssRNAs to predict 3D  
22 structures and stability of dsRNAs from their sequences. Furthermore, in the new version of the  
23 model, an implicit structure-based electrostatic potential is introduced in order to capture the effect of  
24 ions such as  $Mg^{2+}$  on 3D structures and stability of dsRNAs. As compared with the extensive  
25 experimental data, the present model can predict the 3D structures, stability and flexibility of various  
26 dsRNAs with high accuracy, and the effects of monovalent/divalent ions on the stability and  
27 flexibility of dsRNAs can be well captured by the present model. Additionally, our further analyses  
28 show that on thermally unfolding pathway of a dsRNA is dependent on not only its length but also its  
29 sequence.

30

## 1 Model and methods

### 2 Coarse-grained structure model and energy function

3 To reduce the complexity of nucleotides, in our CG model, one nucleotide is represented by  
4 three beads: phosphate bead (P), sugar ring bead (C) and base bead (N) (53,54). The P and C beads  
5 are placed at the P and C4' atom positions, and the base bead (N) is placed at N9 atom position for  
6 purine or N1 for pyrimidine; see Fig. 1. The three beads are treated as van der Waals spheres with the  
7 radii of 1.9 Å, 1.7 Å and 2.2 Å, respectively (53,54).

8 The potential energy of a CG dsRNA is composed of two parts (53,54)

$$9 \quad U_{total} = U_{bonded} + U_{nonbonded}. \quad (1)$$

10 The bonded potential  $U_{bonded}$  represents the energy associated with pseudo-covalent bonds between  
11 contiguous CG beads within any single chain, which includes bond length energy  $U_b$ , bond angle  
12 energy  $U_a$  and dihedral angle energy  $U_d$ :

$$13 \quad U_{bonded} = U_b + U_a + U_d. \quad (2)$$

14 The initial parameters of these potentials were derived from the statistical analysis on the available  
15 3D structures of RNA molecules in PDB (<http://www.rcsb.org/pdb/home/home.do>), and two sets of  
16 parameters  $Para_{helical}$  and  $Para_{nonhelical}$  were provided for stems and single strands/loops, respectively.  
17 Note that only  $Para_{nonhelical}$  is used in folding process and both of  $Para_{helical}$  and  $Para_{nonhelical}$  are used  
18 in structure refinement (53,54). The nonbonded potential  $U_{nonbonded}$  in Eq. 1 includes the following  
19 five components

$$20 \quad U_{nonbonded} = U_{bp} + U_{bs} + U_{cs} + U_{exc} + U_{el}. \quad (3)$$

21  $U_{bp}$  is the base-pairing interaction between Watson-Crick (G-C and A-U) and Wobble (G-U) base  
22 pairs.  $U_{bs}$  and  $U_{cs}$  are sequence-dependent base stacking and coaxial stacking interactions between  
23 two neighbour base pairs and between two neighbour stems, respectively. The strengths of  $U_{bs}$  and  
24  $U_{cs}$  were derived from the combined analysis of available thermodynamic parameters and Monte  
25 Carlo (MC) simulations (53,54).  $U_{exc}$  represents the excluded volume interaction between two CG  
26 beads and it is modelled by a purely repulsive Lennard-Jones potential.

27 The last term  $U_{el}$  in Eq. 3 is a structure-based electrostatic energy for an RNA, which is newly  
28 refined to better capture the contribution of monovalent and divalent ions to RNA 3D structures.

1 The electrostatic potential is treated as a combination of Debye-Hückel approximation and the  
2 counterion condensation (CC) theory (51-54)

$$3 \quad U_{el} = \frac{Q_i Q_j e^2}{4\pi\epsilon_0\epsilon r_{ij}} e^{-\frac{r_{ij}}{l_D}}, \quad (4)$$

4 where  $r_{ij}$  is the distance between the  $i$ -th and  $j$ -th P beads, each of which carries a unit negative  
5 charge ( $-e$ ).  $l_D$  is the Debye length of ion solution.  $\epsilon_0$  is the permittivity vacuum and  $\epsilon$  is the  
6 effective temperature-dependent dielectric constant of water (53,54). The reduced negative charge  
7  $Q_i$  on the  $i$ -th P bead is given by

$$8 \quad Q_i = 1 - f_i, \quad (5)$$

9 where  $f_i$  is the fraction of ion neutralization. In the present model, beyond the assumption of  
10 uniform distribution of binding ions along RNA chain in our previous model,  $f_i$  is dependent on  
11 RNA 3D structure, and includes the contributions of monovalent and divalent ions

$$f_i = x f_i^1 + (1 - x) f_i^2. \quad (6)$$

12 Here,  $x$  and  $1 - x$  represent the contribution fractions from monovalent and divalent ions, which  
13 can be derived from the tightly bound ion (TBI) model (54-59).  $f_i^\nu$  ( $\nu = 1, 2$ ) is the binding fraction  
14 of  $\nu$ -valent ions, and is given by

$$f_i^\nu = \frac{N \bar{f}_i^\nu}{\sum_N e^{-\beta\nu\phi_i}} e^{-\beta\nu\phi_i}, \quad (7)$$

15 where  $N$  is the number of P beads.  $\bar{f}_i^\nu$  represents the average charge neutralization fraction of ions  
16 and the CC theory gives that (51-54)  $\bar{f}_i^\nu = 1 - \left(\frac{b}{\nu l_B}\right)$ , where  $b$  is the average charge spacing on RNA  
17 backbone and  $l_B$  is Bjerrum length.  $\phi_i$  in Eq. 7 is the electrostatic potential at  $i$ -th P bead and can  
18 be approximately calculated by

$$\phi_i = \sum_{j \neq i}^N \frac{l_B Q_j}{r_{ij}} e^{-\frac{r_{ij}}{l_D}}. \quad (8)$$

19 Eqs. 5-8 show that the structure-based reduced charge fraction  $Q_i$  needs to be obtained through an  
20 iteration process; see more details in Supporting Material.

21 The detailed descriptions on the CG energy function as well as the parameters for the potentials  
22 in Eqs. 1-3 can be found in the Supporting Material.

## 23 **Simulation algorithm**

1 To effectively avoid the traps in local energy minima, the MC simulated annealing algorithm is  
2 used to sample conformations for a dsRNA at given monovalent/divalent ion conditions. Based on  
3 the sequence of a dsRNA, two initial random CG chains can be generated and be separately placed in  
4 a cubic box, the size of which is determined by concentration of ssRNA. Generally, the simulation of  
5 a dsRNA system with a given ion condition is performed from a high temperature (e.g., 110°C) to the  
6 target temperature (e.g., room/body temperature). At each temperature, the conformations of the  
7 dsRNA are sampled by intra-strand pivot moves and inter-strand translation/rotation through the  
8 Metropolis algorithm until the system reaches enough equilibrium. In this process, the newly refined  
9 electrostatic potential  $U_{el}$  is involved (see Eq. 4), and  $U_{el}$  can only be obtained after an iterative  
10 process for  $Q_i$ . In practice,  $U_{el}$  is renewed over every 20 MC steps, and generally,  $U_{el}$  can be  
11 obtained through ~4 times iterations for converged  $Q_i$ . Thus the increase in computation cost due to  
12 involving the newly refined  $U_{el}$  is negligible compared to the whole simulation cost. The equilibrium  
13 conformations of the system at each temperature can be saved to obtain 3D structures and structural  
14 properties of the dsRNA at each temperature.

## 15 Calculation of melting temperature

16 The stability of dsRNAs generally depends on strand concentration due to the contribution of  
17 translation entropy of melted ssRNA chains (60). However, for a dsRNA with low strand  
18 concentrations (e.g., 0.1 mM in experiments), a very long simulation time is generally required to  
19 reach equilibrium for the dsRNA system. To make our calculations efficient, the simulations for  
20 dsRNAs can be performed at relatively high strand concentrations  $C_s^h$  (e.g., ~10 mM for dsRNAs  
21 with length  $\leq 10$ -bp and ~1 mM for dsRNAs with length  $> 20$ -nt) (43,61). Based on the equilibrium  
22 conformations at each temperature  $T$ , the fraction  $\Phi(T)$  of unfolded state characterized as  
23 completely dissociated single stranded chain can be obtained at  $T$ . Since the small system of the  
24 simulation (two strands in a simulational box) can lead to a significant finite-size effect (62), the  
25 predicted  $\Phi(T)$  needs to be further corrected to the fraction  $f_h(T)$  of unfolded state at the high bulk  
26 strand concentration  $C_s^h$  (62):

$$f_h(T) = 1 - \left(1 + \frac{\Phi(T)}{2a(1 - \Phi(T))}\right) + \sqrt{\left(1 + \frac{\Phi(T)}{2a(1 - \Phi(T))}\right)^2 - 1}, \quad (9)$$

27 where  $a=1$  and 2 for nonself-complementary and self-complementary sequences, respectively (62).

1 Afterwards, based on  $f_h(T)$  at the high strand concentration, the fraction of unfolded state  $f(T)$  at  
2 an experimental strand concentration  $C_s$  (e.g., ~0.1 mM) can be calculated by (63,64)

$$f(T) = \frac{\lambda f_h(T)}{1 + \lambda f_h(T) - f_h(T)}, \quad (10)$$

3 where  $\lambda = C_s^h / C_s$ . Finally, the fractions of unfolded state  $f(T)$  can be fitted to a two-state model to  
4 obtain the melting temperature  $T_m$  (53,54,63),

$$f(T) = 1 - \frac{1}{1 + e^{(T-T_m)/dT}}, \quad (11)$$

5 where  $dT$  is an adjustable parameter. More details about the calculation of melting temperature are  
6 given in the Supporting Material. For long dsRNAs whose unfolding can be non-two-state transition,  
7 we still used the above formulas to estimate their melting temperatures, in analogy to related  
8 experiment (65).

## 9 **Results and discussion**

10 In this section, the present model was first employed to predict 3D structures of extensive  
11 dsRNAs in monovalent/divalent ion solutions. Afterwards, the model was used to predict stability of  
12 extensive dsRNAs and the effects of monovalent/divalent ions, and further to analyze the thermally  
13 unfolding pathway of various dsRNAs. Finally the model was employed to examine the  
14 salt-dependent flexibility of a dsRNA helix. Our predictions and analyses were extensively compared  
15 with the available experiments and existing models.

### 16 **Structure predictions for dsRNAs in ion solutions**

17 Two sets of available dsRNAs (20~78 nucleotides (nts)) were used in this work on 3D structure  
18 prediction. One set includes 16 dsRNAs whose structures were determined by X-ray experiments  
19 (defined as X-ray set), and the other set contains 10 dsRNAs whose structures were determined by  
20 NMR experiments in ion solutions (defined as NMR set). The PDB codes as well as the descriptions  
21 of the dsRNAs in two sets are shown in Tables 1 and S3, respectively. In the following, we first made  
22 predictions for the 26 structures of dsRNAs in X-ray set and NMR set at high salt concentration (e.g.,  
23 1 M Na<sup>+</sup>). Afterwards, we made predictions for the 3D structures of dsRNAs in NMR set at  
24 respective ion conditions.



## 1 *Structure predictions for dsRNAs at 1M [Na<sup>+</sup>]*

2 For 26 dsRNAs in X-ray set and NMR set, the 3D structures were predicted from sequences  
3 with strand concentration of 0.1 mM at high salt concentration (e.g., 1 M Na<sup>+</sup>), regardless of possible  
4 ion effects. In the following, we used a paradigm dsRNA (PDB code: 2jxq; shown in Table 1) to  
5 show the structure predicting process of dsRNA with the present model, which is shown in Fig. 1C.  
6 First, the energy of the system reduces with the decrease of temperature (from 100°C to room  
7 temperature) and the dsRNA folds into native-like structures (e.g., structure c in Fig. 1D) from an  
8 initial random configuration (e.g., structure a in Fig. 1D). Second, a further structure refinement  
9 ( $\sim 1.2 \times 10^7$  MC steps) is performed at the target temperature (e.g., room temperature), where the  
10 last predicted structure from the annealing process is taken as input and the parameters  $Para_{\text{nonhelical}}$   
11 of bonded potentials are replaced by  $Para_{\text{helical}}$  for the base-paired regions in order to better capture  
12 the geometry of helical stems (53,54). Finally, an ensemble of refined 3D structures ( $\sim 10000$   
13 structures) can be obtained over the last  $\sim 1 \times 10^6$  MC steps, and these structures can be evaluated  
14 by the root-mean-square deviation (RMSD) values calculated over all the beads in predicted  
15 structures from the corresponding atoms in the native structures in PDB (66). As shown in Fig. 1C  
16 and Fig. 2, for the dsRNA of PDB code 2jxq, the mean RMSD (the averaged value over the refined  
17 structures) and the minimum RMSD (from the structure closest to the native one) are 2.1 Å and 0.8  
18 Å, respectively.

19 Following the above process, the 3D structures of 26 dsRNAs including 15 dsRNAs with  
20 bulge/internal loops were predicted by the present model with the overall mean RMSD of  $\sim 3.3$  Å and  
21 the overall minimum RMSD of  $\sim 1.8$  Å; see Figs. 2 and 3 and Table S1 in the Supporting Material.  
22 This shows that the present model with coaxial/base stacking can reliably capture the 3D shapes of  
23 various dsRNAs including those with bulge/internal loops. For 13 dsRNAs with internal loops, the  
24 overall mean RMSD is  $\sim 4.2$  Å, which is slightly larger than that ( $\sim 3.3$  Å) of all the 26 dsRNAs. This  
25 is because large internal loops generally contain non-canonical base pairs, which is ignored in the  
26 present model. For example, the dsRNA of PDB code 3wbm contains 2 internal loops with several  
27 non-canonical base pairs to keep the helix more continuous than the predicted one; see Fig. 2C.

## 28 *Structure predictions for dsRNAs in various ion solutions*



1 Since RNA structures can be strongly influenced by ions (10-14), we introduced the  
2 structure-based electrostatic potential in the present model to improve the 3D structure prediction for  
3 dsRNAs at the respective ion conditions. In the following, we first examined the structure-based  
4 electrostatic potential through the charge neutralization fractions  $f^{\text{Na}}$  and  $f^{\text{Mg}}$  of  $\text{Na}^+$  and  $\text{Mg}^{2+}$   
5 along an example dsRNA (PDB code: 2gm0) in mixed  $\text{Na}^+/\text{Mg}^{2+}$  solutions. As shown in Fig. 3B,  
6  $f^{\text{Na}}$  and  $f^{\text{Mg}}$  appear dependent on  $\text{Na}^+/\text{Mg}^{2+}$  concentrations as well as dsRNA structures: (i) as  
7  $\text{Mg}^{2+}$  concentration increases,  $f^{\text{Mg}}$  increases and  $f^{\text{Na}}$  decreases, due to the competition between  
8  $\text{Mg}^{2+}$  and  $\text{Na}^+$  in binding to an RNA and lower binding entropy penalty for  $\text{Mg}^{2+}$  at higher  $\text{Mg}^{2+}$   
9 concentration (10-14,55-59); (ii)  $f^{\text{Na}}$  and  $f^{\text{Mg}}$  are larger at bent regions and appear less at two  
10 ends, which is attributed to the higher P beads charge density at bending regions and lower P beads  
11 charge density at two ends of the dsRNA. Therefore, the newly refined electrostatic potential (Eqs.  
12 4-8) can capture the structure-based ion binding and the competitive binding between  $\text{Na}^+$  ions and  
13  $\text{Mg}^{2+}$  ions to a dsRNAs.

14 To examine whether the involvement of the implicit structure-based electrostatic potential (Eqs.  
15 4-8) and corresponding ion conditions can improve 3D structure prediction for dsRNAs, we further  
16 predicted the 3D structures for 10 dsRNAs in NMR set at their respective experimental ion  
17 conditions. For the 10 dsRNAs, the overall mean RMSD between predicted structures in ion  
18 solutions and the native structures is  $\sim 3.7$  Å, which is visibly smaller than that ( $\sim 4.3$  Å) of the  
19 predictions at 1 M [ $\text{Na}^+$ ]; see Table 1. This suggests that the inclusion of structure-based electrostatic  
20 potential and corresponding ion conditions in this model can improve the predictions on 3D  
21 structures for dsRNAs in ion solutions. Furthermore, Table 1 also shows that such improvement  
22 appears more pronounced for the dsRNAs with internal loops and for the ion conditions containing  
23  $\text{Mg}^{2+}$ , e.g., mean RMSDs of the dsRNA of 2gm0 and 1tut decrease from 7.8 Å and 3.9 Å to 6.1 Å  
24 and 3.2 Å, respectively. This indicates that the newly refined electrostatic potential can effectively  
25 involve the RNA structure information and the effect of ions such as  $\text{Mg}^{2+}$ .

## 26 *Comparisons with other models*

27 To further examine the present model, we made the extensive comparisons with three existing  
28 RNA structure prediction models: FARNA (31), RACER (44,45) and MC-Fold/MC-Sym pipeline  
29 (24). FARNA is a fragment-assembly model with high resolution for small RNAs (31). As shown in

1 Fig. 4A, the average mean RMSD ( $\sim 3.9$  Å) from the present model is very slightly smaller than that  
2 ( $\sim 4.1$  Å) from FARNA. Afterwards, we made the comparison with a newly developed CG model  
3 RACER (44). As shown in Fig. 4B, the mean RMSD of the predictions from our model ( $\sim 2.6$  Å) is  
4 slightly smaller than that ( $\sim 3.2$  Å) from RACER. Furthermore, we made the extensive comparison  
5 with MC-Fold/MC-Sym pipeline (24), a well-established RNA 2D/3D structure prediction model  
6 with a web server (<http://www.major.irc.ca/MC-Pipeline>). We used the web server of  
7 MC-Fold/MC-Sym pipeline to predict the structures of all the dsRNAs involved in our structure  
8 prediction and chose the top 1 predicted structure to make comparisons with the present model. As  
9 shown in Fig. 4C, the average mean RMSD ( $\sim 3.3$  Å) of the predictions from the present model is  
10 slightly smaller than that ( $\sim 3.8$  Å) of the top 1 structures from MC-Fold/MC-Sym pipeline.  
11 Therefore, the present model can be reliable in predicting 3D structures of dsRNAs. Beyond 3D  
12 structure predictions, the present model can also predict stability and flexibility of dsRNAs in ion  
13 solutions.

## 14 **Stability of dsRNAs in ion solutions**

### 15 *Stability of dsRNAs with various sequences*

16 As described in the section of Model and methods, for a dsRNA with a given strand  
17 concentration, the melting curve as well as the melting temperature  $T_m$  can be calculated by the  
18 present model. For example, for the sequence (CGCG)<sub>2</sub>, the melting curve of the dsRNA with a high  
19 strand concentration of 10 mM can be predicted based on the fractions of unfolded state at different  
20 temperatures, and the melting curve as well as the melting temperature  $T_m$  of the dsRNA at low  
21 (experimental) strand concentration (0.1 mM) can be calculated through Eqs. 9-11; see Figs. 5A and  
22 B. As shown in Figs. 5A and B, the predicted  $T_m$  of the sample sequence (CGCG)<sub>2</sub> with experimental  
23 strand concentration of 0.1 mM is  $\sim 19.5^\circ\text{C}$ , which agrees well with the corresponding experimental  
24 value ( $\sim 19.3^\circ\text{C}$ ). Furthermore, we further predicted the thermodynamic stability of 22 dsRNAs  
25 (4~14-bp) with various complementary sequences; see Table 2. Here, dsRNAs are assumed in  
26 solutions of 1 M [Na<sup>+</sup>], to solely examine the stabilities of various dsRNAs and make comparisons  
27 with extensive experimental data (64,65,67-69). As shown in Table 2,  $T_m$ 's of extensive dsRNAs  
28 from the present model are in good agreement with the corresponding experimental data with the

1 mean deviation  $\sim 1.3^\circ\text{C}$  and maximum deviations  $< 2.5^\circ\text{C}$ . Such agreement indicates that the  
2 sequence-dependent base pairing and base stacking interactions in the present model can well  
3 capture the stability of dsRNAs of extensive sequences and different lengths (64,65,67-69).

#### 4 *Thermally unfolding pathways of dsRNAs*

5 Since intermediate states of RNAs can be important to their functions (1-3,10,70,71), we made  
6 further analyses on thermally unfolding pathways for different dsRNAs. To distinguish the possible  
7 different states of dsRNAs at different temperatures in our simulations, all the states for a dsRNA  
8 were more detailedly divided into unfolded state (U, two disassociated single strands), possible  
9 hairpin state (H, with at least one hairpin), folded helix state (F, with the formation of all base pairs  
10 except for the two end ones) and partially folded helix state (P, other conformations besides U, F and  
11 H states).

12 As shown in Fig. 6, the unfolding pathways of dsRNAs are dependent on their length as well as  
13 sequences. For short sequences ( $\leq 6$ -nt), dsRNAs undergo the standard two-state melting transitions  
14 and there is almost no intermediate states such as P and H states; see Figs. 6A and B, which is  
15 consistent with the previous experiments (65). As chain length increases to  $\sim 8$ -bp, P state begins to  
16 appear and can become visible at  $\sim T_m$ ; see Figs. 6C and D. Figs. 6C and D also show that the  
17 unfolding pathways of dsRNAs with the same chain length but different sequences would be slightly  
18 different, e.g., the fraction of P state of (AACUAGUU)<sub>2</sub> with end A-U base pairs is slightly higher  
19 than that of (CCAU AUGG)<sub>2</sub> with end G-C base pairs. This is because the unstable end A-U base  
20 pairs can induce more notable P state than stable end G-C base pairs; see Fig. S1 in the Supporting  
21 Material.

22 For dsRNAs with more than 10 base pairs, their thermally unfolding pathways become more  
23 complex and interesting, since their single stranded chain may fold to hairpin structures. As shown in  
24 Figs. 6E and F for the dsRNA of (CCUUGAUUAUCAAGG)<sub>2</sub> and (AAAAAAAAUUUUUUU)<sub>2</sub>, the  
25 fractions of F state are near unity at low temperature. As temperature increases, the dsRNAs begin to  
26 melt and H states would form from the melted ssRNAs with the maximum fractions near 0.2 and 0.5  
27 for the two dsRNAs, respectively. At higher temperature, the dsRNAs almost become completely  
28 melted as U state. Notably, as shown in Fig. 6F, the unfolding pathway of  
29 (AAAAAAAAUUUUUUU)<sub>2</sub> predicted by the present model is very close to the corresponding

1 experiments (65,68), suggesting that the melting pathways of dsRNAs can be well captured by our  
2 analyses with the present model. The difference on unfolding pathways between the two dsRNAs is  
3 attributed to the different sequences, i.e., G-C content, especially at two ends. Specifically, the  
4 fractions of states follow the order of  $F > U \gtrsim H > P$  for  $(CCUUGAUAUCAAGG)_2$  at  $\sim 70^\circ\text{C}$ ,  
5 while for  $(AAAAAAAAUUUUUU)_2$  at  $\sim 45^\circ\text{C}$ , such order becomes  $H > F \gtrsim U > P$ . To reveal what  
6 determines the order, we calculated the stability for the states with Mfold (72). We found that the  
7 order of state fractions is in agreement with that of state stability. For example, the formation free  
8 energies for F, H and P states are  $\sim -0.5$  kcal/mol,  $\sim -0.2$  kcal/mol and  $\sim -1.5$  kcal/mol for  
9  $(CCUUGAUAUCAAGG)_2$  at  $\sim 70^\circ\text{C}$ , respectively. For  $(AAAAAAAAUUUUUU)_2$  at  $\sim 45^\circ\text{C}$ , the  
10 formation free energies for H, F and P states are  $\sim -0.8$  kcal/mol,  $\sim -0.1$  kcal/mol and  $\sim -0.6$  kcal/mol.  
11 This indicates that the unfolding pathway of dsRNA is dependent on the stability of possible states.

12 Although unfolding of long dsRNAs can be non-two-state transitions, in analogy to experiments  
13 (65), we can still estimate their melting temperatures by assuming strands completely disassociated  
14 state as U state (65); see Eq. 11 in section of Model and method.

#### 15 *Stability of dsRNAs with bulge/internal loops*

16 Beyond the dsRNAs with complementary sequences shown above, the stability of other 8  
17 dsRNAs with bulge/internal loops was examined by the present model. As shown in Table 3, for the  
18 dsRNAs with single/double bulge loops of different loop lengths (sequences 1-6) and the dsRNAs  
19 with internal loops (sequences 7 and 8), the mean deviation between the predicted  $T_m$ 's and the  
20 experimental data (73-79) is  $\sim 2.6^\circ\text{C}$ , which indicates that the present model with the coaxial stacking  
21 potential can roughly estimate the stability of dsRNAs with bulge/internal loops. However, such  
22 predictions especially for dsRNAs with long bulge/internal loops are not as precise as those for  
23 dsRNAs without loops. The detailed comparisons with experimental data show that, the predicted  
24  $T_m$ 's for the dsRNAs with 1-nt bulge loop are slightly higher than experimental data, while the  
25 present model underestimates the stability of dsRNAs with longer bulge loops, which may suggest  
26 that the coaxial stacking potential  $U_{cs}$  involved in the present model may slightly overestimate the  
27 coaxial interaction strength while underestimates the coaxial interaction range. For the dsRNAs with  
28 internal loop (e.g., AA/AA or AAA/AAA), the present model underestimates their stability, which  
29 may be attributed to the ignorance of non-canonical base pairs in the present model (79).

## 1 *Effects of monovalent and divalent ions*

2 The thermal stability of RNA molecules is generally sensitive to the ionic conditions (10-14,  
3 55-59). Particularly,  $Mg^{2+}$  is efficient in neutralizing the negative charges on RNA molecule and  
4 generally plays important role in RNA folding (14,57,59,80-83). However, most of the existing  
5 structure prediction models cannot quantitatively predict the stability of dsRNAs in ion solutions,  
6 especially in the presence of  $Mg^{2+}$ . Here, we employed the present model to examine the stability for  
7 dsRNAs over a wide range of monovalent and divalent ion concentrations.

8 First, we examined the effect of monovalent ions on the stability of dsRNAs. As shown in Fig.  
9 7A, for 5 dsRNAs with different sequences and lengths, the predicted melting temperatures  $T_m$ 's  
10 from the present model agree well with the experimental data (64,65,67-69,83) with a mean  
11 deviation  $<2^\circ C$  over the wide range of  $[Na^+]$ . As  $[Na^+]$  increases from 10 mM to 1000 mM,  $T_m$ 's of  
12 the dsRNAs increase obviously, which is attributed to lower ion-binding entropy penalty and  
13 stronger ion neutralization for base pair formation at high  $[Na^+]$ ; see also Fig. S1 in the Supporting  
14 Material. Furthermore, Fig. 7A shows that the  $[Na^+]$ -dependence of  $T_m$  is stronger for longer dsRNAs.  
15 This is because base pair formation of longer dsRNAs causes larger build-up of negative charges and  
16 consequently causes stronger  $[Na^+]$ -dependent ion-binding.

17 Second, we examined the stability of dsRNAs in mixed monovalent and divalent ion solutions.  
18 As shown in Fig. 7B, for 3 different dsRNAs, the predicted  $T_m$ 's are in good accordance with the  
19 experimental data over the wide range of  $[Mg^{2+}]$  (83). Fig. 7B also shows that there are three ranges  
20 in  $T_m$ - $[Mg^{2+}]$  curves: (i) at low  $[Mg^{2+}]$  (relatively to  $[Na^+]$ ), the stability of the dsRNAs is dominated  
21 by the background  $[Na^+]$  and  $T_m$ 's of the dsRNAs are almost the same with the corresponding pure  
22  $[Na^+]$ ; (ii) with the increase of  $[Mg^{2+}]$ ,  $Mg^{2+}$  ions begin to play a role and  $T_m$  increases  
23 correspondingly; (iii) when  $[Mg^{2+}]$  becomes very high (relatively to  $[Na^+]$ ), the stability is dominated  
24 by  $Mg^{2+}$ . Furthermore, it is shown that  $Mg^{2+}$  is very efficient in stabilizing dsRNAs. Even in the  
25 background of 110 mM  $Na^+$ ,  $\sim 1$  mM  $Mg^{2+}$  begins to enhance the stability of dsRNAs, and 10 mM  
26  $Mg^{2+}$  (+110 mM background  $Na^+$ ) can achieve the similar stability to 1 M  $Na^+$  for dsRNAs; see  
27 sequences of CCUUGAUAUCAAGG and CCAUAUGG in Figs. 7A and B. This is attributed to the  
28 high ionic charge of  $Mg^{2+}$  and the consequent efficient role in stabilizing dsRNAs (57,59, 64,80-83).

## 29 **Flexibility of dsRNA in ion solutions**

1 DsRNAs generally are rather flexible in ion solutions due to the polymeric nature, and the  
2 flexibility is extremely important for their biological functions. Additionally, dsRNA flexibility is  
3 highly dependent on solution ion conditions (84-86). In this section, we further employed the present  
4 model to examine the flexibility of a 40-bp RNA helix in ion solutions. The sequence of the dsRNA  
5 helix is 5'-CGACUCUACGGAAGGGCAUCCUUCGGGCAUCACUACGCGC-3' with 57% CG  
6 content in its central 30-bp segment and the other chain is fully complementary to it, which is  
7 selected according to previous studies (85). First, we predicted the 3D structures for the dsRNA helix  
8 from the sequence at 25°C, and afterwards, we performed further simulations for the dsRNA helix at  
9 various ion conditions based on the predicted structures. The enough conformations at equilibrium at  
10 each ion condition were used to analyze the salt-dependent flexibility of the dsRNA helix; see Fig.  
11 S2 in Supporting Material.

#### 12 *Structure fluctuation of a dsRNA in ion solutions*

13 In the following, we first examined the structure fluctuation of the dsRNA helix through  
14 calculating end-to-end distance, RMSD variance and root mean square fluctuation (RMSF) at  
15 different  $[\text{Na}^+]$ 's (84). As  $[\text{Na}^+]$  increases, the end-to-end distance of the dsRNA helix decreases, e.g.,  
16 from ~125 Å at 10 mM  $[\text{Na}^+]$  to ~90 Å at 1 M  $[\text{Na}^+]$ , and simultaneously, the variance of end-to-end  
17 distance increases; see Figs. 8A and B. This indicates the stronger bending conformations and the  
18 higher bending fluctuation for the dsRNA helix at higher ion concentrations, which is attributed to  
19 the stronger ion neutralization on P beads charges and consequently the reduced electrostatic  
20 repulsion due to bending (80-88). The RMSD variance of the dsRNA helix at different  $[\text{Na}^+]$ 's  
21 calculated based on the conformation-averaged reference structure also indicates that the dsRNA  
22 helix would become more flexible with the increase of  $[\text{Na}^+]$ ; see Fig. 8C. To examine local structure  
23 fluctuation, we further calculated the RMSF of the centers of each base pairs of the dsRNA helix at  
24 different  $[\text{Na}^+]$ 's. As shown in Fig. 8D, the RMSF increases as  $[\text{Na}^+]$  increases from 0.01 M to 1 M,  
25 which is because the stronger ion binding and charge neutralization on P beads enable the larger  
26 fluctuation of base pairs along the helix (88). Additionally, end effect contributes to an extra increase  
27 of RMSF at the two helical ends (88).

#### 28 *Persistence length of a dsRNA helix in ion solutions*



1 Generally, the flexibility of a polymer can be described by its persistence length  $l_p$  (89), and  $l_p$   
2 can be calculated by (90):

$$\langle \cos \theta_i \rangle = \exp\left(-\frac{ib}{l_p}\right), \quad (12)$$

3 where  $\langle \cos \theta_i \rangle = \langle \hat{r}_i \cdot \hat{r}_0 \rangle$  and  $\hat{r}_0$  and  $\hat{r}_i$  are the first and  $i$ -th bond direction vectors, respectively.  $b$   
4 in Eq. 12 is the average bond length. According to Eq. 12,  $l_p$  of the dsRNA helix can be obtained  
5 through modeling the dsRNA helix as a bead chain composed of the central beads of base pairs; see  
6 Fig. 8E. To avoid the end effect (88), the first and last 5 base pairs were excluded in our calculations  
7 and the bond vectors are selected as that over every 5 continuous base pairs (85).

8 As shown in Fig. 8F, the persistence lengths of the 40-bp dsRNA helix at different  $[\text{Na}^+]$ 's  
9 predicted by the present model are in quantitative agreement with the corresponding experimental  
10 data (87). For example, the deviation of  $l_p$  between prediction and experiments is less than  $\sim 2$  nm  
11 over the wide range of  $[\text{Na}^+]$ . As  $[\text{Na}^+]$  increases from 0.01 M to 1 M,  $l_p$  of the dsRNA helix  
12 decreases from  $\sim 70$  nm to  $\sim 50$  nm. This is because more binding ions neutralize the negative P beads  
13 charges on the dsRNA helix more strongly and can reduce the electrostatic bending repulsion along  
14 the strands more strongly, causing stronger bending flexibility at high  $[\text{Na}^+]$ .

## 15 Conclusions

16 Knowledge of the 3D structures and thermodynamic properties of dsRNAs are crucial for  
17 understanding their biological functions. In this work, we have further developed our previous CG  
18 model by introducing a structure-based electrostatic potential and employed the model to predict 3D  
19 structures, stability and flexibility of dsRNAs in monovalent/divalent ion solutions. Our predictions  
20 were extensively compared with experimental data, and the following conclusions have been  
21 obtained:

22 (1) The present model can well predict 3D structures from sequences for extensive dsRNAs  
23 with/without bulge/internal loops in monovalent/divalent ion solutions with overall mean  
24 RMSD  $< 3.5$  Å, and the involvement of the structure-based electrostatic potential and  
25 corresponding experimental ion conditions generally improves the structure predictions with  
26 smaller RMSDs for dsRNAs in ion solutions.



1 (2) The present model can make good prediction on the stability for dsRNAs with extensive  
2 sequences over wide ranges of monovalent/divalent ion concentrations with mean deviation  
3  $<2^{\circ}\text{C}$ , and our analyses show that thermally unfolding pathway of a dsRNA is dependent on  
4 its length as well as its sequence.

5 (3) The present model can well capture the salt-dependent flexibility of dsRNAs and the  
6 predicted salt-dependent persistence lengths are in good accordance with experiments.

7 Although our predictions agree well with the extensive experimental data on 3D structure,  
8 stability and flexibility of dsRNAs, there are still several limitations in the present model. First,  
9 despite that the structure-based electrostatic potential can efficiently capture the effects of  
10 monovalent/divalent ions on the structure, stability and flexibility of dsRNAs, the model was not  
11 examined for RNAs with more complex structures and the model cannot consider concrete ion  
12 distribution and specific ion binding around an RNA. Further development of the present model may  
13 need to involve the effect of ions through an implicit-explicit combined treatment for ions (52).  
14 Second, the model only involves canonical and wobble base pairing such as A-U, G-C and G-U base  
15 pairs, and ignores non-canonical base pairing, which could affect the predictions on the structure and  
16 stability of dsRNAs with internal loops. Further involvement of non-canonical base pairing would  
17 improve the prediction accuracy of the present model (79). Finally, the present model is a CG model,  
18 and it is still necessary to rebuild all-atom structures based on predicted CG ones. Nevertheless, the  
19 present model can well predict 3D structures, stability and flexibility of dsRNAs over the wide  
20 ranges of monovalent/divalent ion concentrations, and can be a good basis for further development  
21 for a predictive model with higher accuracy.

## 22 **Acknowledgements**

23 We are grateful to Professors Shi-Jie Chen (University of Missouri), Xiangyun Qiu (The George  
24 Washington University), Jian Zhang (Nanjing University) and Wenbing Zhang (Wuhan University)  
25 for valuable discussions. This work was supported by grants from the National Science Foundation  
26 of China (11575128, 11605125, and 11774272). Parts of the numerical calculation in this work are  
27 performed on the super computing system in the Super Computing Center of Wuhan University.

28

## 1 References:

- 2 1 Watson, J. D. (2008) Molecular biology of the gene. Pearson/Benjamin Cummings.
- 3 2 Tinoco, I., and Bustamante, C. (1999) How RNA folds. *J. Mol. Biol.*, 293(2), 271-281.
- 4 3 Li, P. T., Viereggs, J., and Tinoco, I. (2008) How RNA unfolds and refolds. *Annu. Rev. Biochem.*, 77, 77-100.
- 5 4 Kuwabara, T., Hsieh, J., Nakashima, K., Taira, K., and Gage, F. H. (2004) A small modulatory dsRNA  
6 specifies the fate of adult neural stem cells. *Cell*, 116(6), 779-793.
- 7 5 Hannon, G. J. (2002) RNA interference. *Nature*, 418(6894), 244-251.
- 8 6 Meister, G., and Tuschl, T. (2004) Mechanisms of gene silencing by double-stranded RNA. *Nature*, 431(7006),  
9 343-349.
- 10 7 Akira, S., and Takeda, K. (2004) Toll-like receptor signalling. *Nature reviews immunology*, 4(7), 499-511.
- 11 8 Chen, S. J. (2008) RNA folding: conformational statistics, folding kinetics, and ion electrostatics. *Annu. Rev.*  
12 *Biophys.*, 37, 197-214.
- 13 9 Mustoe, A. M., Brooks, C. L., and Al-Hashimi, H. M. (2014) Hierarchy of RNA functional dynamics. *Annu.*  
14 *Rev. biochem.*, 83, 441-466.
- 15 10 Draper, D. E., Grilley, D., and Soto, A. M. (2005) Ions and RNA folding. *Annu. Rev. Biophys. Biomol.*  
16 *Struct.*, 34, 221-243.
- 17 11 Lipfert, J., Doniach, S., Das, R., and Herschlag, D. (2014) Understanding nucleic acid-ion interactions. *Annu.*  
18 *Rev. biochem.*, 83, 813-841.
- 19 12 Woodson, S. A. (2005) Metal ions and RNA folding: a highly charged topic with a dynamic future. *Curr. Opin.*  
20 *Chem. Biol.*, 9(2), 104-109.
- 21 13 Draper, D. E. (2013) Folding of RNA tertiary structure: linkages between backbone phosphates, ions, and  
22 water. *Biopolymers*, 99(12), 1105-1113.
- 23 14 Koculi, E., Hyeon, C., Thirumalai, D., and Woodson, S. A. (2007) Charge density of divalent metal cations  
24 determines RNA stability. *J. Am. Chem. Soc.*, 129(9), 2676-2682.
- 25 15 Rose, P. W., Prlic, A., Altunkaya, A., Bi, C., Bradley, A. R., Christie, C. H., Costanzo, L. D., Duarte, J. M.,  
26 Dutta, S., Feng, Z., Green, R. K., Goodsell, D. S., Hudson, B., Kalro, T., Lowe, R., Peisach, E., Randle, C.,  
27 Rose, A. S., Shao, C., Tao, Y. P., Valasatava, Y., Voigt, M., Westbrook, J. D., Woo, J., Yang, H., Young, J. Y.,  
28 Zardecki, C., Berman, H. M. and Burley, S. K. (2017) The RCSB protein data bank: integrative view of  
29 protein, gene and 3D structural information. *Nucleic Acids Res.*, 45, D271-D281.
- 30 16 Sim, A. Y., Minary, P., and Levitt, M. (2012) Modeling nucleic acids. *Curr. Opin. Struct. Biol.*, 22(3), 273-278.
- 31 17 Miao, Z. and Westhof, E. (2017) RNA Structure: advances and assessment of 3D structure prediction. *Annu.*  
32 *Rev. Biophys.*, 46, 483-503.
- 33 18 Schlick, T. and Pyle, A. M. (2017) Opportunities and challenges in RNA structural modeling and design.  
34 *Biophys. J.* 113, 225-234.
- 35 19 Sun, L. Z., Zhang, D., and Chen, S. J., (2017) Theory and modeling of RNA structure and interactions with  
36 metal ions and small molecules. *Annu. Rev. Biophys.*, 46, 227-246.
- 37 20 Somarowthu, S. (2016) Progress and current challenges in modeling large RNAs. *J. Mol. Biol.* 428, 736-747
- 38 21 Shi, Y. Z., Wu, Y. Y., Wang, F. H. and Tan, Z. J. (2014) RNA structure prediction: progress and  
39 perspective. *Chin. Phys. B.*, 23(7), 078701.

- 1 22 Cragnolini, T., Derreumaux, P. and Pasquali, S. (2015) Ab initio RNA folding. *J. Phys. Condens. Matt.*, 27,  
2 233102.
- 3 23 Zhou, H. X. (2014) Theoretical frameworks for multiscale modeling and simulation. *Curr. Opin. Struct. Biol.*,  
4 25, 67-76.
- 5 24 Parisien, M. and Major, F. (2008) The MC-Fold and MC-Sym pipeline infers RNA structure from sequence  
6 data. *Nature.*, 452, 51-55.
- 7 25 Zhao, Y., Huang, Y., Gong, Z., Wang, Y., Man, J. and Xiao, Y. (2012) Automated and fast building of  
8 three-dimensional RNA structures. *Sci. Rep.*, 2, 734104.
- 9 26 Wang, J., Zhao, Y., Zhu, C., and Xiao, Y. (2015) 3dRNAscore: a distance and torsion angle dependent  
10 evaluation function of 3D RNA structures. *Nucleic Acids Res.*, 43(10), e63.
- 11 27 Wang, J., Mao, K., Zhao, Y., Zeng, C., Xiang, J., Zhang, Y. and Xiao, Y. (2017) Optimization of RNA 3D  
12 structure prediction using evolutionary restraints of nucleotide-nucleotide interactions from direct coupling  
13 analysis. *Nucleic Acids Res.*, 45, 6299-6309.
- 14 28 Popenda, M., Szachniuk, M., Antczak, M., Purzycka, K. J., Lukasiak, P., Bartol, N., Blazewicz, J., and  
15 Adamiak, R. W. (2012) Automated 3D structure composition for large RNAs. *Nucleic Acids Res.*, 40(14),  
16 e112-e112.
- 17 29 Cao, S. and Chen, S. J. (2011) Physics-based de novo prediction of RNA 3D structures. *J. Phys. Chem. B.*, 115,  
18 4216-4226.
- 19 30 Xu, X., Zhao, P. and Chen, S. J. (2014) Vfold: a web server for RNA structure and folding thermodynamics  
20 prediction. *PLoS One.*, 9, e107504.
- 21 31 Das, R. and Baker, D. (2007) Automated de novo prediction of native-like RNA tertiary structures. *Proc. Natl.*  
22 *Acad. Sci. USA*, 104, 14664-14669.
- 23 32 Jonikas, M. A., Radmer, R. J., Laederach, A., Das, R., Pearlman, S., Herschlag, D. and Altman, R. B. (2009)  
24 Coarse-grained modeling of large RNA molecules with knowledge-based potentials and structural filters. *RNA*,  
25 15, 189-199.
- 26 33 Boudard, M., Barth, D., Bernauer, J., Denise, A. and Cohen, J. (2017) GARN2: coarse-grained prediction of  
27 3D structure of large RNA molecules by regret minimization. *Bioinformatics*, 33, 2479-2486.
- 28 34 Kim, N., Laing, C., Elmetwaly, S., Jung, S., Curuksu, J. and Schlick, T. (2014) Graph-based sampling for  
29 approximating global helical topologies of RNA. *Proc. Natl. Acad. Sci. USA*, 111, 4079-4084.
- 30 35 Jain, S., and Schlick, T. (2017) F-RAG: Generating Atomic Coordinates from RNA Graphs by Fragment  
31 Assembly. *J. Mol. Biol.*, 429(23), 3587-3605.
- 32 36 Zhang, J., Bian, Y., Lin, H., and Wang, W. (2012) RNA fragment modeling with a nucleobase discrete-state  
33 model. *Phys. Rev. E.*, 85(2), 021909.
- 34 37 Bian, Y, Zhang, J, Wang, J, Wang, J, Wang, W. (2015) Free energy landscape and multiple folding pathways of  
35 an H-Type RNA pseudoknot. *PLoS One*, 10: e0129089.
- 36 38 Li, J., Zhang, J., Wang, J., Li, W. and Wang, W. (2016) Structure prediction of RNA loops with a probabilistic  
37 approach. *PLoS Comput. Biol.*, 12, e1005032.
- 38 39 Uusitalo, J. J., Ingolfsson, H. I., Marrink, S. J. and Faustino, I. (2017) Martini Coarse-Grained force field:  
39 extension to RNA. *Biophys. J.*, 113, 246-256.

- 1 40 Sieradzan, A. K., Makowski, M., Augustynowicz, A., and Liwo, A. (2017). A general method for the  
2 derivation of the functional forms of the effective energy terms in coarse-grained energy functions of polymers.  
3 I. Backbone potentials of coarse-grained polypeptide chains. *J. Chem. Phys.*, 146(12), 124106.
- 4 41 Ding, F., Sharma, S., Chalasani, P., Demidov, V. V., Broude, N. E. and Dokholyan, N. V. (2008) Ab initio  
5 RNA folding by discrete molecular dynamics: From structure prediction to folding mechanisms. *RNA*, 14,  
6 1164-1173.
- 7 42 Boniecki, M. J., Lach, G., Dawson, W. K., Tomala, K., Lukasz, P., Soltysinski, T., Rother, K. M. and Bujnicki,  
8 J. M. (2016) SimRNA: a coarse-grained method for RNA folding simulations and 3D structure prediction.  
9 *Nucleic Acids Res.*, 44, e63.
- 10 43 Cragolini, T., Derreumaux, P. and Pasquali, S. (2013) Coarse-Grained simulations of RNA and DNA  
11 duplexes. *J. Phys. Chem. B.*, 117, 8047-8060.
- 12 44 Xia, Z., Bell, D. R., Shi, Y. and Ren, P. (2013) RNA 3D structure prediction by using a Coarse-Grained model  
13 and experimental data. *J. Phys. Chem. B.*, 117, 3135-3144.
- 14 45 Bell, D. R., Cheng, S. Y., Salazar, H., and Ren, P. (2017) Capturing RNA Folding Free Energy with  
15 Coarse-Grained Molecular Dynamics Simulations. *Scientific Reports*, 7, 45812.
- 16 46 Denesyuk, N. A. and Thirumalai, D. (2013) Coarse-Grained model for predicting RNA folding  
17 thermodynamics. *J. Phys. Chem. B.*, 117, 4901-4911.
- 18 47 Hori N., Denesyuk N. A., Thirumalai D. (2016) Salt effects on the thermodynamics of a frameshifting RNA  
19 pseudoknot under tension. *J. Mol. Biol.*, 428: 2847-2859.
- 20 48 Šulc, P., Romano, F., Ouldridge, T. E., Doye, J. P. K. and Louis, A. A. (2014) A nucleotide-level  
21 coarse-grained model of RNA. *J. Chem. Phys.*, 140, 235102.
- 22 49 He, Y., Maciejczyk, M., Ołdziej, S., Scheraga, H. A. and Liwo, A. (2013) Mean-field interactions between  
23 nucleic-acid-base dipoles can drive the formation of a double helix. *Phys. Rev. Lett.*, 110, 98101.
- 24 50 He, Y., Liwo, A. and Scheraga, H. A. (2015) Optimization of a Nucleic Acids united-RESidue 2-Point model  
25 (NARES-2P) with a maximum-likelihood approach. *J. Chem. Phys.*, 143, 243111.
- 26 51 Manning, G. S. (1978) The molecular theory of polyelectrolyte solutions with applications to the electrostatic  
27 properties of polynucleotides. *Q. Rev. Biophys.*, 11, 179-246.
- 28 52 Hayes, R. L., Noel, J. K., Mandic, A., Whitford, P. C., Sanbonmatsu, K. Y., Mohanty, U. and Onuchic, J. N.  
29 (2015) Generalized manning condensation model captures the RNA ion atmosphere. *Phys. Rev. Lett.*, 114,  
30 258105.
- 31 53 Shi, Y. Z., Wang, F. H., Wu, Y. Y. and Tan, Z. J. (2014) A coarse-grained model with implicit salt for RNAs:  
32 Predicting 3D structure, stability and salt effect. *J. Chem. Phys.*, 141, 105102.
- 33 54 Shi, Y. Z., Jin, L., Wang, F. H., Zhu, X. L. and Tan, Z. J. (2015) Predicting 3D structure, flexibility, and  
34 stability of RNA hairpins in monovalent and divalent ion solutions. *Biophys. J.*, 109, 2654-2665.
- 35 55 Tan, Z. J. and Chen, S. J. (2005) Electrostatic correlations and fluctuations for ion binding to a finite length  
36 polyelectrolyte. *J. Chem. Phys.*, 122, 044903.
- 37 56 Tan, Z. J. and Chen, S. J. (2011) Salt contribution to RNA tertiary structure folding stability. *Biophys. J.*, 101,  
38 176-187.
- 39 57 Tan, Z. J. and Chen, S. J. (2010) Predicting ion binding properties for RNA tertiary structures. *Biophys. J.*, 99,

- 1 1565-1576.
- 2 58 Wang, F. H., Wu, Y. Y. and Tan, Z. J. (2013) Salt contribution to the flexibility of single-stranded nucleic acid  
3 of finite length. *Biopolymers.*, 99 (6), 370-381.
- 4 59 Xi, K., Wang, F., Xiong, G., Zhang, Z. and Tan, Z. J. (2018) Competitive binding of  $Mg^{2+}$  and  $Na^+$  ions to  
5 nucleic acids: from helices to tertiary structures. *Biophys. J.*, 114(8), 1776-1790.
- 6 60 Privalov, P. L. and Crane-Robinson, C. (2018) Translational entropy and DNA duplex stability. *Biophys J.*,  
7 114, 15-20.
- 8 61 Cao, S., and Chen, S. J. (2006) Free energy landscapes of RNA/RNA complexes: with applications to snRNA  
9 complexes in spliceosomes. *J. Mol. Biol.*, 357(1), 292-312.
- 10 62 Ouldridge, T. E., Louis, A. A. and Doye, J. P. (2010) Extracting bulk properties of self-assembling systems  
11 from small simulations. *J. Phys. Condens. Matt.*, 22, 104102.
- 12 63 Borer, P. N., Dengler, B., Tinoco, I. J. and Uhlenbeck, O. C. (1974) Stability of ribonucleic acid  
13 double-stranded helices. *J Mol Biol.*, 86, 843-853.
- 14 64 Tan, Z. J. and Chen, S. J. (2007) RNA Helix Stability in Mixed  $Na^+/Mg^{2+}$  Solution. *Biophys. J.* 92, 3615-3632.
- 15 65 Xia, T., SantaLucia, J., Burkard, M. E., Kierzek, R., Schroeder, S. J., Jiao, X., Cox, C. and Turner, D. H. (1998)  
16 Thermodynamic Parameters for an Expanded Nearest-Neighbor Model for Formation of RNA Duplexes with  
17 Watson-Crick Base Pairs. *Biochemistry.*, 37, 14719-14735.
- 18 66 Parisien, M., Cruz, J. A., Westhof, E. and Major, F. (2009) New metrics for comparing and assessing  
19 discrepancies between RNA 3D structures and models. *RNA*, 15, 1875-1885.
- 20 67 Nakano, S., Fujimoto, M., Hara, H. and Sugimoto, N. (1999) Nucleic acid duplex stability: influence of base  
21 composition on cation effects. *Nucleic Acids Res.*, 27, 2957-2965.
- 22 68 Hickey, D. R. and Turner, D. H. (1985) Solvent Effects on the Stability of A7U7p. *Biochemistry.*, 24,  
23 2086-2094.
- 24 69 Chen, Z. and Znosko, B. M. (2013) Effect of sodium ions on RNA duplex Stability. *Biochemistry.*, 52,  
25 7477-7485.
- 26 70 Wang Y, Gong S, Wang Z, Zhang W. (2016) The thermodynamics and kinetics of a nucleotide base pair. *J.*  
27 *Chem. Phys.*, 144: 115101.
- 28 71 Shi, Y. Z, Jin, L., Feng, C. J., Tan, Y. L. and Tan, Z. J. (2018) Predicting 3D structure and stability of RNA  
29 pseudoknots in monovalent and divalent ion solutions. *PLoS Comput. Biol.*.
- 30 72 Zuker M. (2003) Mfold web server for nucleic acid folding and hybridization prediction. *Nucleic Acids Res.*,  
31 31: 3406-3415.
- 32 73 Tomcho, J. C., Tillman, M. R. and Znosko, B. M. (2015) Improved model for predicting the free energy  
33 contribution of dinucleotide bulges to RNA duplex stability. *Biochemistry*, 54, 5290-5296.
- 34 74 Crowther, C. V., Jones, L. E., Morelli, J. N., Mastrogiacomo, E. M., Porterfield, C., Kent, J. L. and Serra, M. J.  
35 (2016) Influence of two bulge loops on the stability of RNA duplexes. *RNA*, 23(2), 217-228.
- 36 75 Znosko, B. M., Silvestri, S. B., Volkman, H., Boswell, B. and Serra, M. J. (2002) Thermodynamic parameters  
37 for an expanded nearest-neighbor model for the formation of RNA duplexes with single nucleotide bulges.  
38 *Biochemistry*, 41, 10406-10417.
- 39 76 Murray, M. H., Hard, J. A. and Znosko, B. M. (2014) Improved model to predict the free energy contribution

- 1 of trinucleotide bulges to RNA duplex stability. *Biochemistry*, 53, 3502-3508.
- 2 77 Chen, G., Znosko, B. M., Jiao, X. and Turner, D. H. (2004) Factors affecting thermodynamic stabilities of  
3 RNA 3 × 3 internal loops. *Biochemistry*, 43, 12865-12876.
- 4 78 Longfellow, C. E., Kierzek, R. and Turner, D. H. (1990) Thermodynamic and spectroscopic study of bulge  
5 loops in oligoribonucleotide. *Biochemistry*, 29, 278.
- 6 79 SantaLucia, J., Kierzek, R. and Turner, D. H. (1991) Stabilities of consecutive AC, CC, GG, UC, and UU  
7 Mismatches in RNA internal loops: evidence for stable Hydrogen-Bonded UU and CC Pairs. *Biochemistry*, 30,  
8 8242.
- 9 80 Zhang, Z. L., Wu, Y. Y., Xi, K., Sang, J. P., and Tan, Z. J. (2017). Divalent ion-mediated DNA-DNA  
10 interactions: A comparative study of triplex and duplex. *Biophys. J.*, 113(3), 517-528.
- 11 81 Pabit, S. A., Sutton, J. L., Chen, H. and Pollack, L. (2013) Role of ion valence in the submillisecond collapse  
12 and folding of a small RNA domain. *Biochemistry*, 52, 1539-1546.
- 13 82 Leipply, D. and Draper, D. E. (2011) Effects of Mg<sup>2+</sup> on the free energy landscape for folding a purine  
14 riboswitch RNA. *Biochemistry*, 50, 2790-2799.
- 15 83 Serra, M. J., Baird, J. D., Dale, T., Fey, B. L., Retatagos, K. and Westhof, E. (2002) Effects of magnesium  
16 ions on the stabilization of RNA oligomers of defined structures. *RNA*, 8, 307-323.
- 17 84 Hagerman, P. J. (1997). Flexibility of RNA. *Annu. Rev. Biophys. Biomol. Struct.*, 26(1), 139-156.
- 18 85 Bao, L., Zhang, X., Shi, Y. Z., Wu, Y. Y. and Tan, Z. J. (2017) Understanding the relative flexibility of RNA  
19 and DNA duplexes: stretching and twist-stretch coupling. *Biophys J.*, 112, 1094-1104.
- 20 86 Zhang, X., Bao, L., Wu, Y. Y., Zhu, X. L. and Tan, Z. J. (2017) Radial distribution function of semiflexible  
21 oligomers with stretching flexibility. *J. Chem. Phys.*, 147(5), 054901.
- 22 87 Herrero-Galán, E., Fuentes-Perez, M. E., Carrasco, C., Valpuesta, J. M., Carrascosa, J. L., Moreno-Herrero, F.  
23 and Arias-Gonzalez, J. R. (2013) Mechanical identities of RNA and DNA double helices unveiled at the  
24 single-molecule level. *J Am. Chem. Soc.*, 135, 122-131.
- 25 88 Wu, Y. Y., Bao, L., Zhang, X. and Tan, Z. J. (2015) Flexibility of short DNA helices with finite-length effect:  
26 From base pairs to tens of base pairs. *J. Chem. Phys.*, 142, 125103.
- 27 89 Kebbekus, P., Draper, D. E. and Hagerman, P. J. (1995) Persistence Length of RNA., *Biochemistry.*, 34,  
28 4354-4357.
- 29 90 Ullner, M. and Woodward, C. E. (2002) Orientational correlation function and persistence lengths of flexible  
30 polyelectrolytes. *Macromolecules.*, 35, 1437-1445.
- 31



## 1 FIGURES AND TABLES

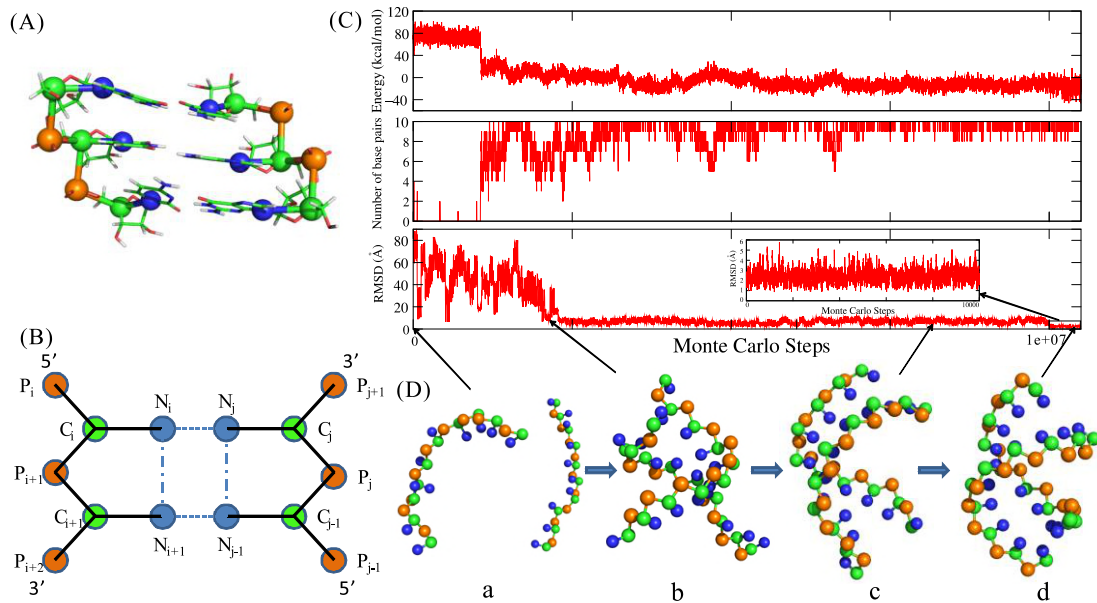

2

3 FIGURE 1. (A) The coarse-grained representation for one fragment of a dsRNA superposed on an  
4 all-atom representation. The beads of P (orange) and C (green) are located at P atom in phosphate  
5 group and C4' atom in sugar ring, respectively. The beads of N (blue) are located at N9 atom position  
6 for purine or N1 atom position for pyrimidine. (B) The schematic representation for pseudo bonds  
7 (solid lines), base pairing (dashed lines) and base stacking (dash-dotted line) in the present model. (C),  
8 (D) Illustration for the folding process of a typical dsRNA (PDB code: 2jxq) in the present model. (C)  
9 The system energy (top panel), number of base pairs (middle panel) and the RMSD (bottom panel)  
10 along the simulated annealing MC simulation. The inserted panel is the zoomed RMSD of the  
11 structure in the refinement procedure at the end of the simulation. (D) The four typical conformation  
12 states in the folding procedure. The structures are shown with PyMol (<http://www.pymol.org>).

13



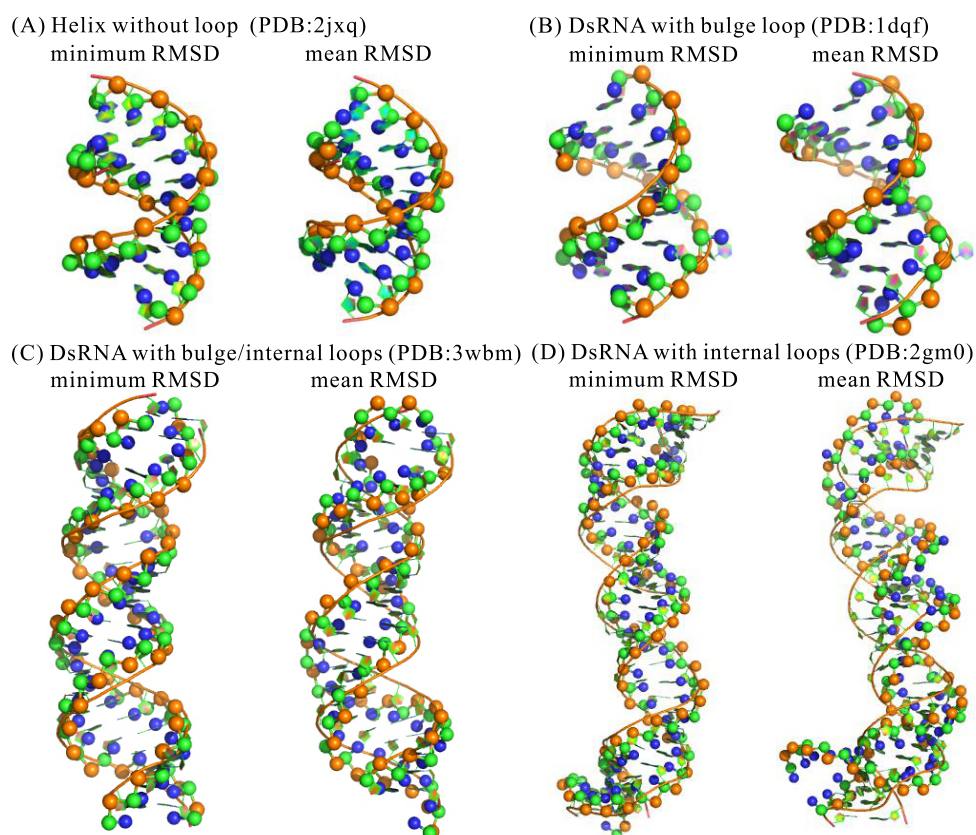

1

2

3

4

5

6

7

8

9

10

FIGURE 2. The predicted 3D structures (ball-stick) with mean/minimum RMSDs, in comparison with the corresponding native structures (cartoon) for four typical dsRNAs. (A) A dsRNA helix without loop (PDB code: 2jxq) with mean/minimum RMSDs of 2.0 Å/0.8 Å. (B) A dsRNA containing a bulge loop (PDB code: 1dqf) with mean/minimum RMSDs of 2.5 Å/1.6 Å. (C) A dsRNA containing 2 bulge loops and 2 internal loops (PDB code: 3wbm) with mean/minimum RMSDs of 5.4 Å/2.3 Å. (D) A dsRNA containing 4 internal loops (PDB code: 2gm0) with mean/minimum RMSDs of 6.1 Å/3.1 Å. The structures are shown with PyMol (<http://www.pymol.org>).

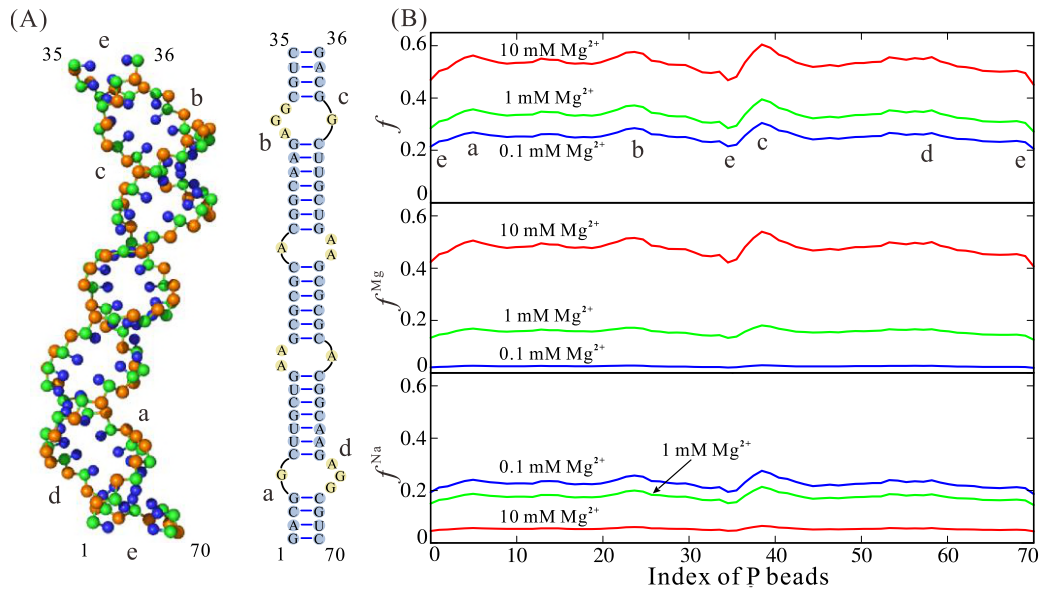

1  
 2 FIGURE 3. (A) The predicted 3D structure (left, shown with PyMol) and secondary structure (right)  
 3 of a dsRNA (PDB: 2gm0). (B) The calculated ion charge neutralization fractions along P beads of the  
 4 predicted structure of the dsRNA at different ion conditions; see Eq. 6.  $f$ : the total ion neutralization  
 5 fractions (top panel).  $f^{Mg}$ : neutralization fractions of  $Mg^{2+}$  (middle panel).  $f^{Na}$ : neutralization  
 6 fractions of  $Na^+$  (bottom panel). The blue, green and red lines denote the cases of the dsRNA in 150  
 7 mM  $Na^+$  solutions mixed with 0.1 mM, 1 mM and 10 mM  $Mg^{2+}$ , respectively. The two bent regions  
 8 labeled with (a, d) and (b, c) induced by the internal loops correspond to the ion neutralization  
 9 fraction peaks in panel B, and two helical ends of the dsRNA labeled with e correspond to the ion  
 10 neutralization fraction troughs in panel B.

11

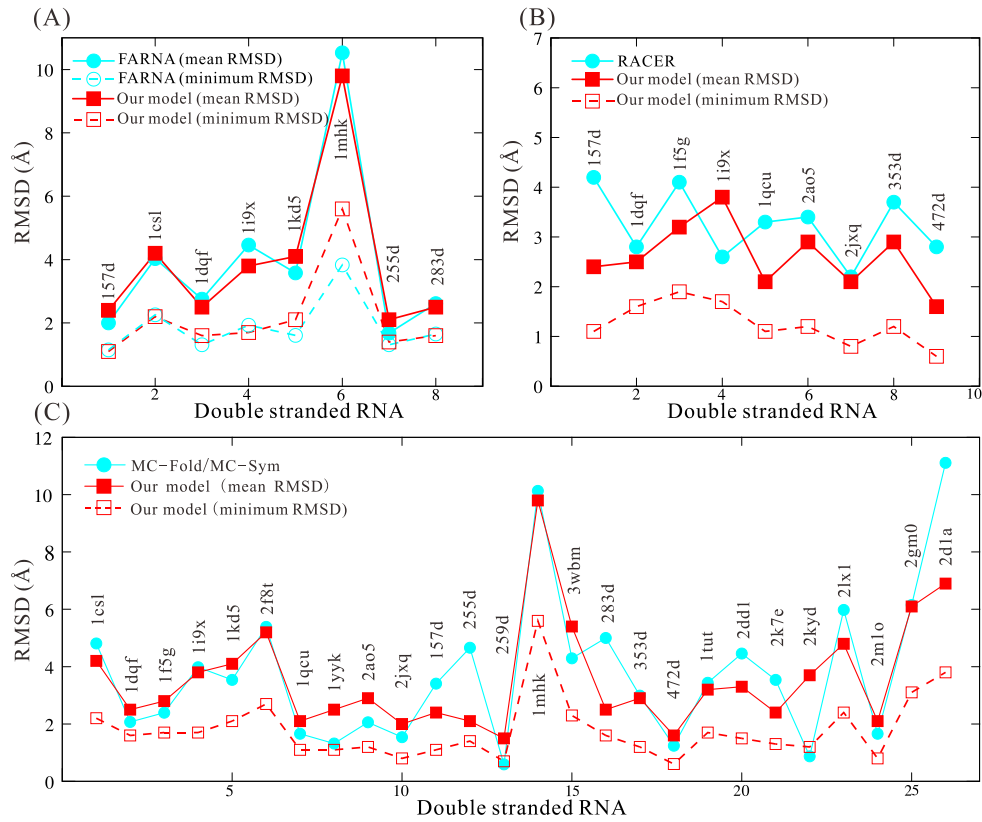

1

2 FIGURE 4. The comparisons of the predicted 3D structures between the present model and the  
3 existing models: (A) FARNA (31), (B) RACER (45,46) and (C) MC-Fold/MC-Sym pipeline (24).

4 The RMSDs of structures predicted by FARNA are calculated over the C4' atom (31). The RMSDs  
5 of structures predicted by RACER, MC-Fold/MC-Sym pipeline and the present model are calculated  
6 over all CG beads (24,45). The data of FARNA and RACER are taken from Ref. 31 and Ref. 45,  
7 respectively.

8

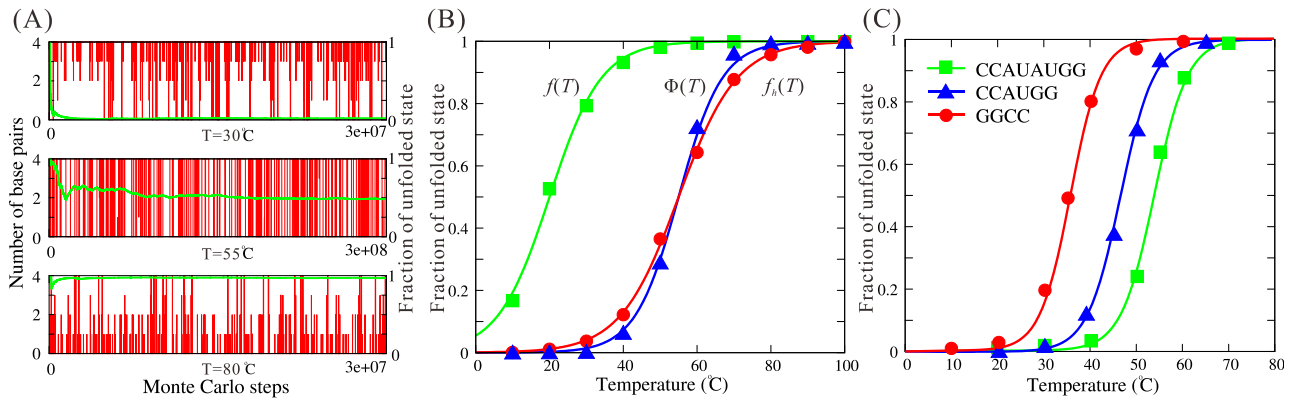

1

2 FIGURE 5. (A) The time-evolution of the number of base pairs (vertical or red lines) and the average  
3 fractions of unfolded state (transverse or green lines) for the sample dsRNA of  $(CGCG)_2$  at 30°C (top  
4 panel), 55°C (middle panel) and 80°C (bottom panel). (B) The fractions of unfolded state as functions  
5 of temperature for the dsRNA of  $(CGCG)_2$ . Symbols: the predicted data at different temperatures;  
6 blue triangle: at high strand concentration (10 mM); red circle: the corrected value of  $f_h(T)$  by Eq.  
7 9; green square: at experimental strand concentration (0.1 mM) derived by Eq. 10. Lines: the fitted  
8 melting curve to the predicted data through Eq. 11. More details can be found in Supporting Material.  
9 (C) The fractions of unfolded states for three dsRNAs with 0.1 mM strand concentration as functions  
10 of temperature. Symbols are the predicted data and lines are the fitted curves for the three dsRNAs  
11 through Eq.11.



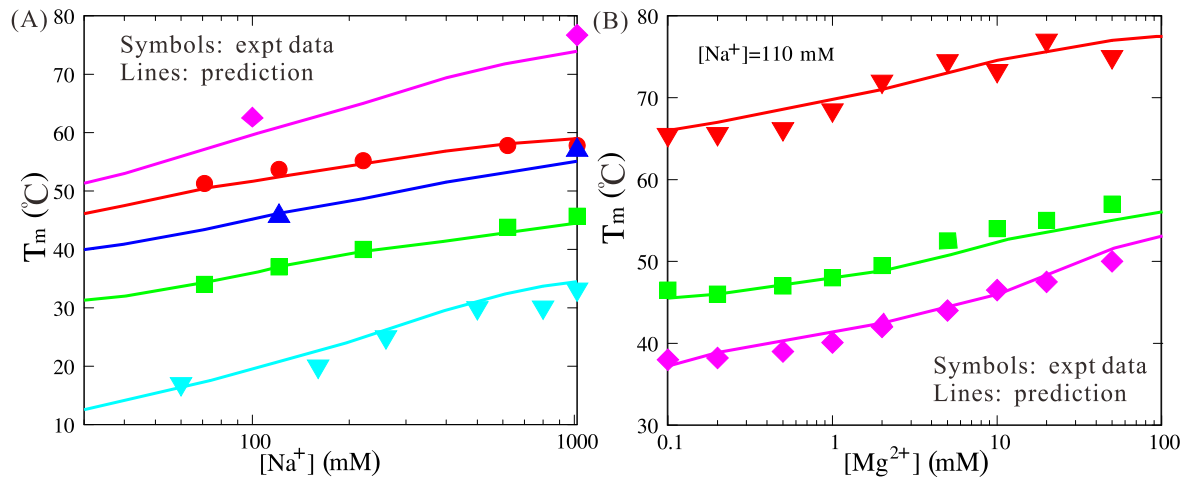

1

2 FIGURE 7. (A) The predicted melting temperatures  $T_m$  and corresponding experimental data  
3 (64,65,67-69,83) as functions of  $[Na^+]$  for sequences: CCUUGAUAUCAAGG, CGCGCG,  
4 CCAUAUGG, AACUAGUU and AAAAAAAAAUUUUUUU (from top to bottom). (B) The predicted  
5 melting temperatures  $T_m$  and corresponding experimental data (83) as functions of  $[Mg^{2+}]$  for  
6 sequences: CCUUGAUAUCAAGG, CCAUAUGG and CCAUGG (from top to bottom). Note that  
7 the solutions contain 110 mM  $Na^+$  as background (83).

8

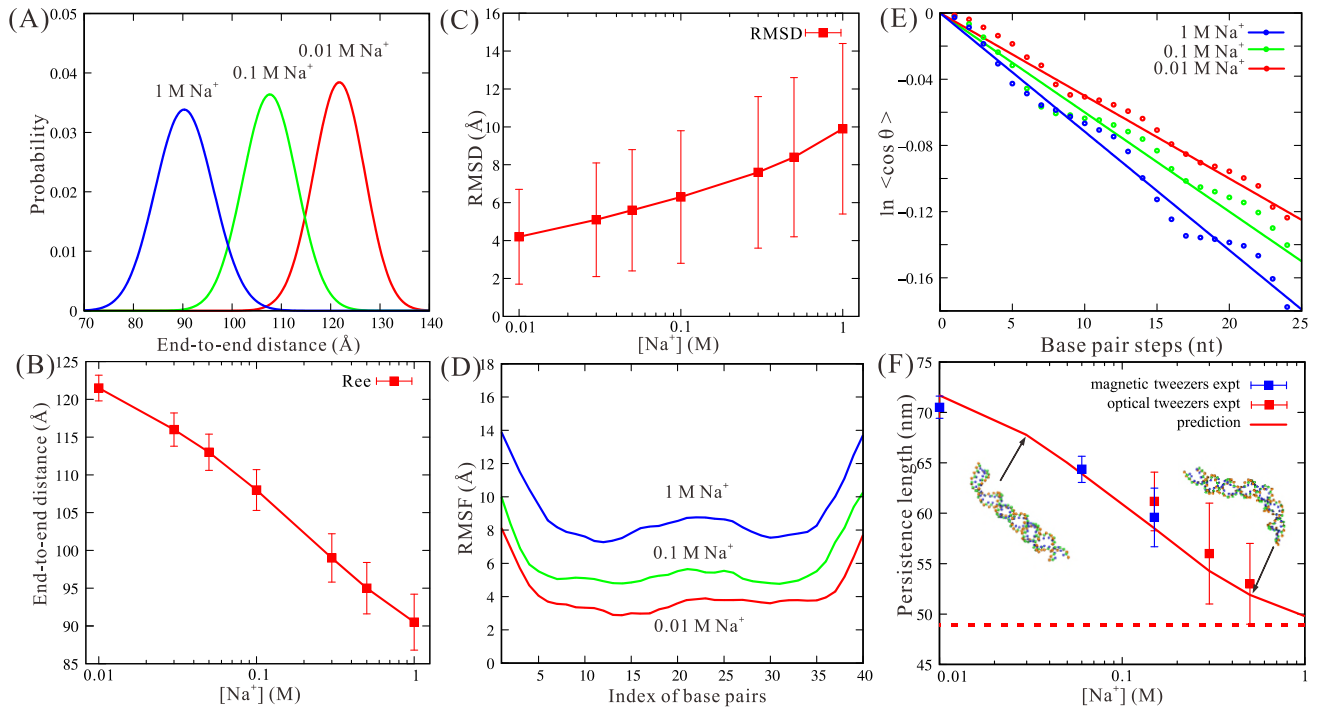

1

2 **FIGURE 8.** (A) The distributions of end-to-end distance for the 40-bp dsRNA helix at 1 M, 0.1 M  
 3 and 0.01 M  $[\text{Na}^+]$ , respectively. (B) The mean end-to-end distances of the 40-bp dsRNA helix as a  
 4 function of  $[\text{Na}^+]$ . Here, the error bars denote the variance for the end-to-end distances. (C) The  
 5 RMSD of the 40-bp dsRNA helix calculated based on the conformation-averaged reference structure  
 6 of the respective simulation as a function of  $[\text{Na}^+]$ . Here, the error bars denote the variances for the  
 7 RMSDs. (D) The RMSF of base pairs along the 40-bp dsRNA helix from simulated ensembles at 1  
 8 M, 0.1 M and 0.01 M  $[\text{Na}^+]$ 's. (E) The fitting curves for  $l_p$  through Eq.12 for the 40-bp dsRNA helix  
 9 at 1 M, 0.1 M and 0.01 M  $[\text{Na}^+]$ 's. (F) The predicted persistence length  $l_p$  (lines) for the 40-bp  
 10 dsRNA helix as a function of  $[\text{Na}^+]$ . Blue squares: experimental data from magnetic tweezers method  
 11 (87); red squares: experimental data from optical tweezers method (87). The dashed line in panel (F)  
 12 shows the predicted  $l_p$  with assuming all P beads are electrically neutral.

13



1 Table 1. 10 dsRNAs in NMR set for structure prediction at respective salt conditions.

| PDB code | Description <sup>a</sup> | Length (nt) | [Na <sup>+</sup> ]/[Mg <sup>2+</sup> ] <sup>b</sup><br>mM/mM | mean/minimum RMSDs <sup>c</sup> (Å) |                   |
|----------|--------------------------|-------------|--------------------------------------------------------------|-------------------------------------|-------------------|
|          |                          |             |                                                              | In 1M [Na <sup>+</sup> ]            | In Expt. solution |
| 2gm0     | I                        | 70          | 250/0.1                                                      | 7.8/3.5                             | 6.1/3.1           |
| 2m1o     | H                        | 14          | 80/0.1                                                       | 2.4/1.1                             | 2.0/0.7           |
| 1tut     | I                        | 22          | 80/3                                                         | 3.9/2.2                             | 3.2/1.7           |
| 2kyd     | H                        | 40          | 150/10                                                       | 3.8/1.2                             | 3.7/1.2           |
| 2d1a     | I                        | 78          | 50/0                                                         | 7.4/4.1                             | 6.9/3.8           |
| 2dd1     | I                        | 20          | 90/0                                                         | 3.7/1.5                             | 3.3/1.5           |
| 2k7e     | I                        | 24          | 110/0                                                        | 2.8/1.2                             | 2.4/1.3           |
| 2lx1     | I                        | 22          | 90/0                                                         | 5.6/3.3                             | 4.8/2.4           |
| 2jxq     | H                        | 20          | 60/0                                                         | 2.1/0.8                             | 2.0/0.8           |
| 1f5g     | I                        | 20          | 80/0                                                         | 3.2/1.9                             | 2.8/1.7           |

<sup>a</sup> H stands for dsRNAs of complementary duplex, and I stands for dsRNAs with internal loop.

<sup>b</sup> The experimental ion conditions for structure determination by NMR method.

<sup>c</sup> The RMSDs are calculated over all three CG beads of predicted structures by the present model from the corresponding atoms of the native structures.

2

3

1

Table 2. The melting temperatures  $T_m$ 's for 20 dsRNAs in 1 M [Na<sup>+</sup>] solution.

|    | Sequence <sup>a</sup>        | Length (bp) | Expt. (°C) <sup>d</sup> | Pred. (°C) | Deviation (°C) |
|----|------------------------------|-------------|-------------------------|------------|----------------|
| 1  | CGCG                         | 4           | 19.9                    | 19.5       | -0.4           |
| 2  | GGCC                         | 4           | 34.3                    | 35.1       | +0.8           |
| 3  | GCGC                         | 4           | 26.6                    | 28.1       | +1.5           |
| 4  | CCGG                         | 4           | 27.2                    | 26.6       | -0.6           |
| 5  | CGCGCG                       | 6           | 57.8                    | 58.5       | +0.7           |
| 6  | CCGCGG                       | 6           | 59.8                    | 61.2       | +1.4           |
| 7  | CCAUGG                       | 6           | 46.4                    | 45.3       | -1.1           |
| 8  | GUCGAC                       | 6           | 45.3                    | 46.8       | +1.5           |
| 9  | AGCGCU                       | 6           | 50.2                    | 51.1       | +0.9           |
| 10 | UCAUGA                       | 6           | 27.2                    | 25.7       | -1.5           |
| 11 | GAGGAG                       | 6           | 50.9                    | 52.0       | +1.1           |
| 12 | AACUAGUU                     | 8           | 45.7                    | 45.5       | -0.2           |
| 13 | ACUUAAGU                     | 8           | 40.3                    | 41.3       | +1.0           |
| 14 | ACCUUUGG                     | 8           | 56.3                    | 54.8       | -1.5           |
| 15 | GCCAUGGC                     | 8           | 71.4                    | 69.5       | -1.9           |
| 16 | GCUGCGAC                     | 8           | 67.9                    | 65.8       | -2.1           |
| 17 | CCAUAUGG                     | 8           | 57.0                    | 59.1       | +2.1           |
| 18 | GAACGUUC                     | 8           | 52.3                    | 53.6       | +1.3           |
| 19 | AAGGUUGGAA                   | 10          | 66.5                    | 64.1       | -2.4           |
| 20 | AUUGGAUACAAA <sup>b</sup>    | 12          | 55.4                    | 58.1       | +2.7           |
| 21 | AAAAAAAAUUUUUUU <sup>c</sup> | 14          | 33.2                    | 35.0       | +1.8           |
| 22 | CCUUGAUUCAAGG                | 14          | 76.7                    | 74.3       | -2.4           |

<sup>a</sup> There is only one sequence for a dsRNA, and the other is complementary to the shown one. The strand concentrations are 0.1 mM.

<sup>b</sup> The strand concentration of AUUGGAUACAAA is 8 μM.

<sup>c</sup> The strand concentration of AAAAAAAAAUUUUUUU is 3.9 μM.

<sup>d</sup> The experimental data are from Refs. (65,67-69).

2

3

1 Table 3. The melting temperatures  $T_m$  for 8 dsRNAs with bulge/internal loop in 1 M Na<sup>+</sup> solution.

|   | Sequence <sup>a</sup>                      | Description <sup>b</sup> | Expt. (°C) <sup>c</sup> | Pred. (°C) | Deviation(°C) |
|---|--------------------------------------------|--------------------------|-------------------------|------------|---------------|
| 1 | UGAC <u>G</u> CUCA<br>ACUG GAGU            | B                        | 42.2                    | 45.0       | +2.8          |
| 2 | GACU <u>A</u> UGUC<br>CUGA ACAG            | B                        | 34.2                    | 36.1       | +1.9          |
| 3 | GACU <u>A</u> GUGUC<br>CUGA ACAG           | B                        | 31.9                    | 29.5       | -2.4          |
| 4 | GACU <u>CA</u> UCCUG<br>CUGG GGAC          | B                        | 40.7                    | 37.9       | -2.8          |
| 5 | GC <u>A</u> GUUC <u>A</u> CG<br>CG CAAG GC | B                        | 35.5                    | 36.8       | +1.3          |
| 6 | CG <u>A</u> GUAC CG<br>GC CAUG <u>A</u> GC | B                        | 43.6                    | 41.5       | -2.1          |
| 7 | CGC <u>AA</u> GCG<br>GCG <u>AA</u> CGC     | I                        | 35.5                    | 33.2       | -2.3          |
| 8 | CGC <u>AA</u> AGGC<br>GCG <u>AA</u> ACCG   | I                        | 38.5                    | 33.1       | -5.4          |

<sup>a</sup> The strand concentrations are 0.1 mM.

<sup>b</sup> B stands for a dsRNA with bulge loop, and I stands for a dsRNA with internal loop.

<sup>c</sup> The experimental data are from Refs. (73-79).

2
